# Supplementary material for: Application of a novel haplotype‐based scan for local adaptation to study high‐altitude adaptation in rhesus macaques
Source: PubMed Central journal article supplement (PMC8327953; doi:10.1002/evl3.232), 2021-05-22

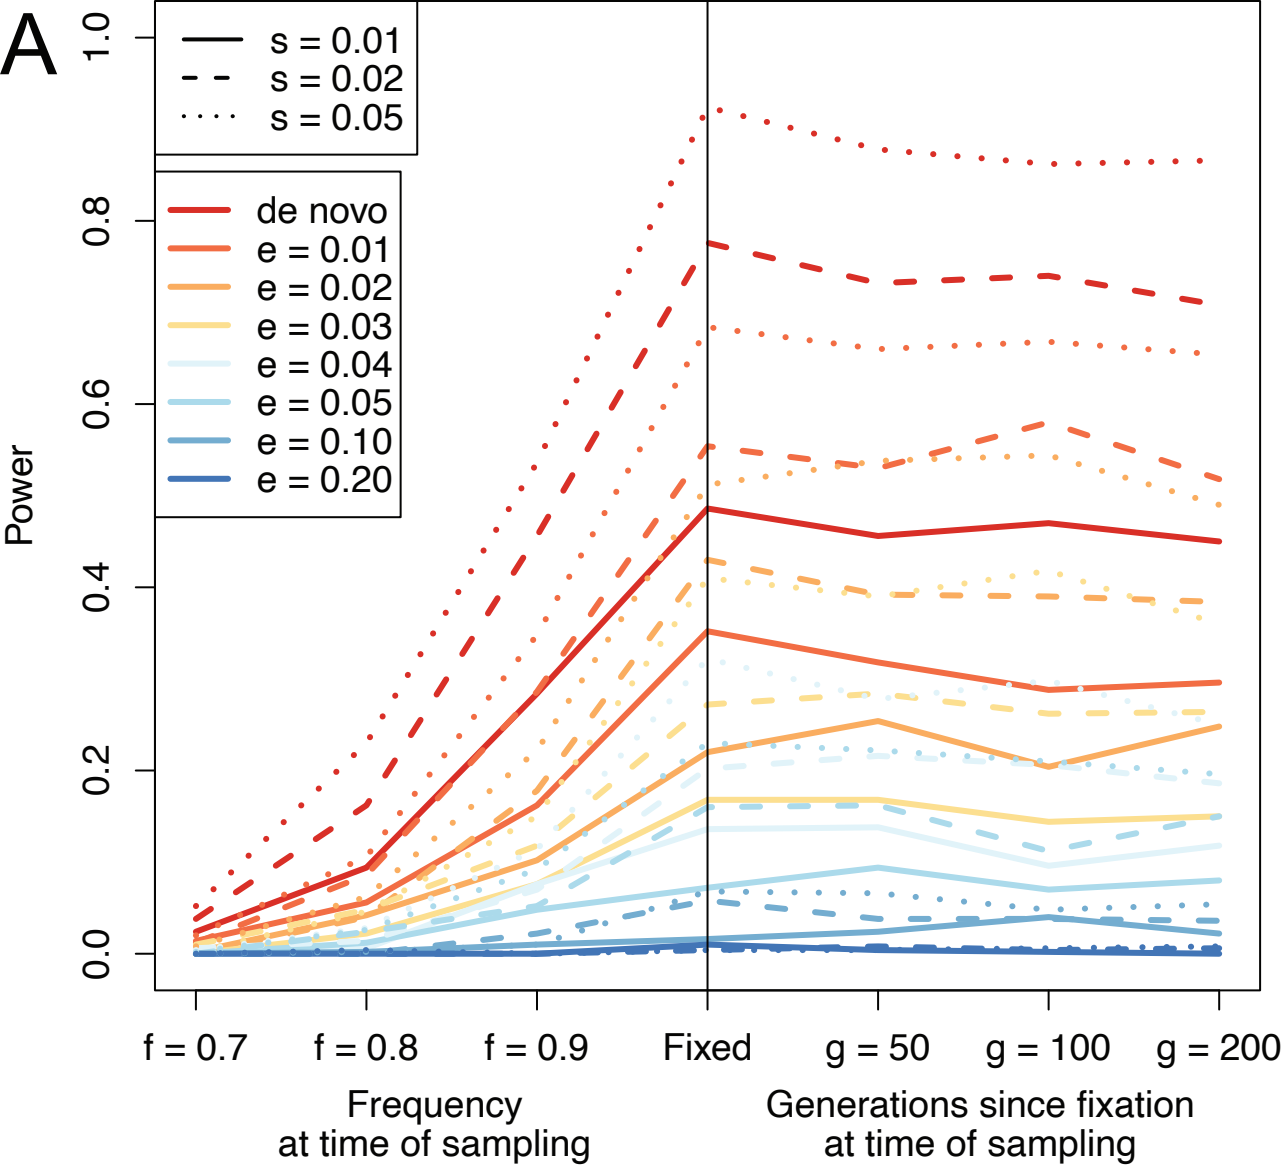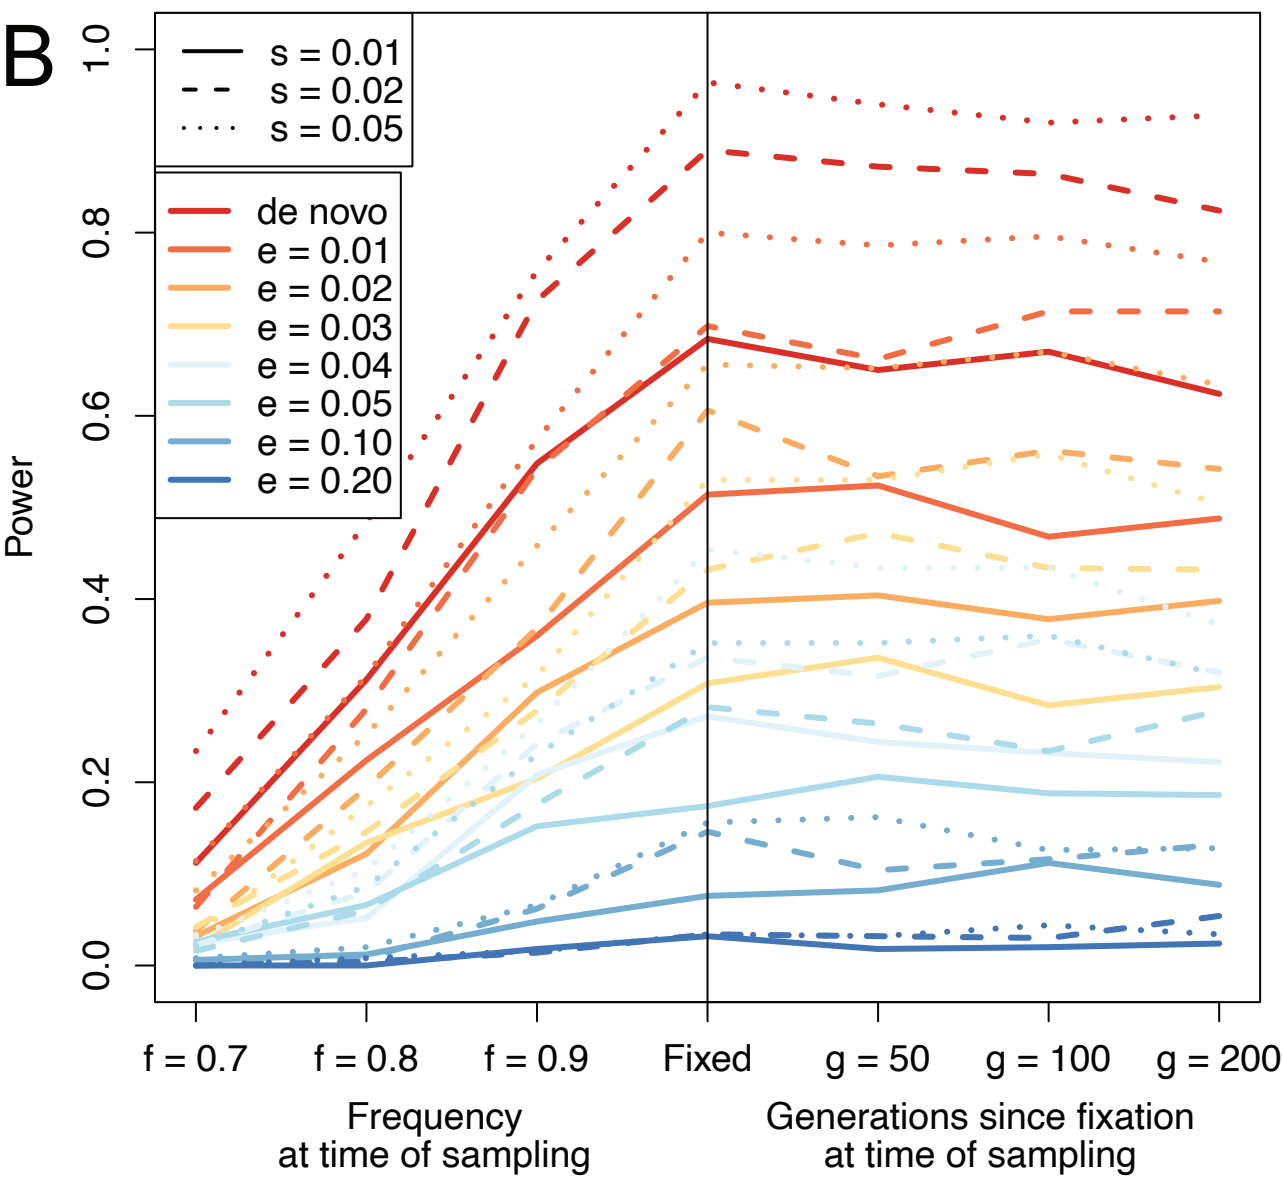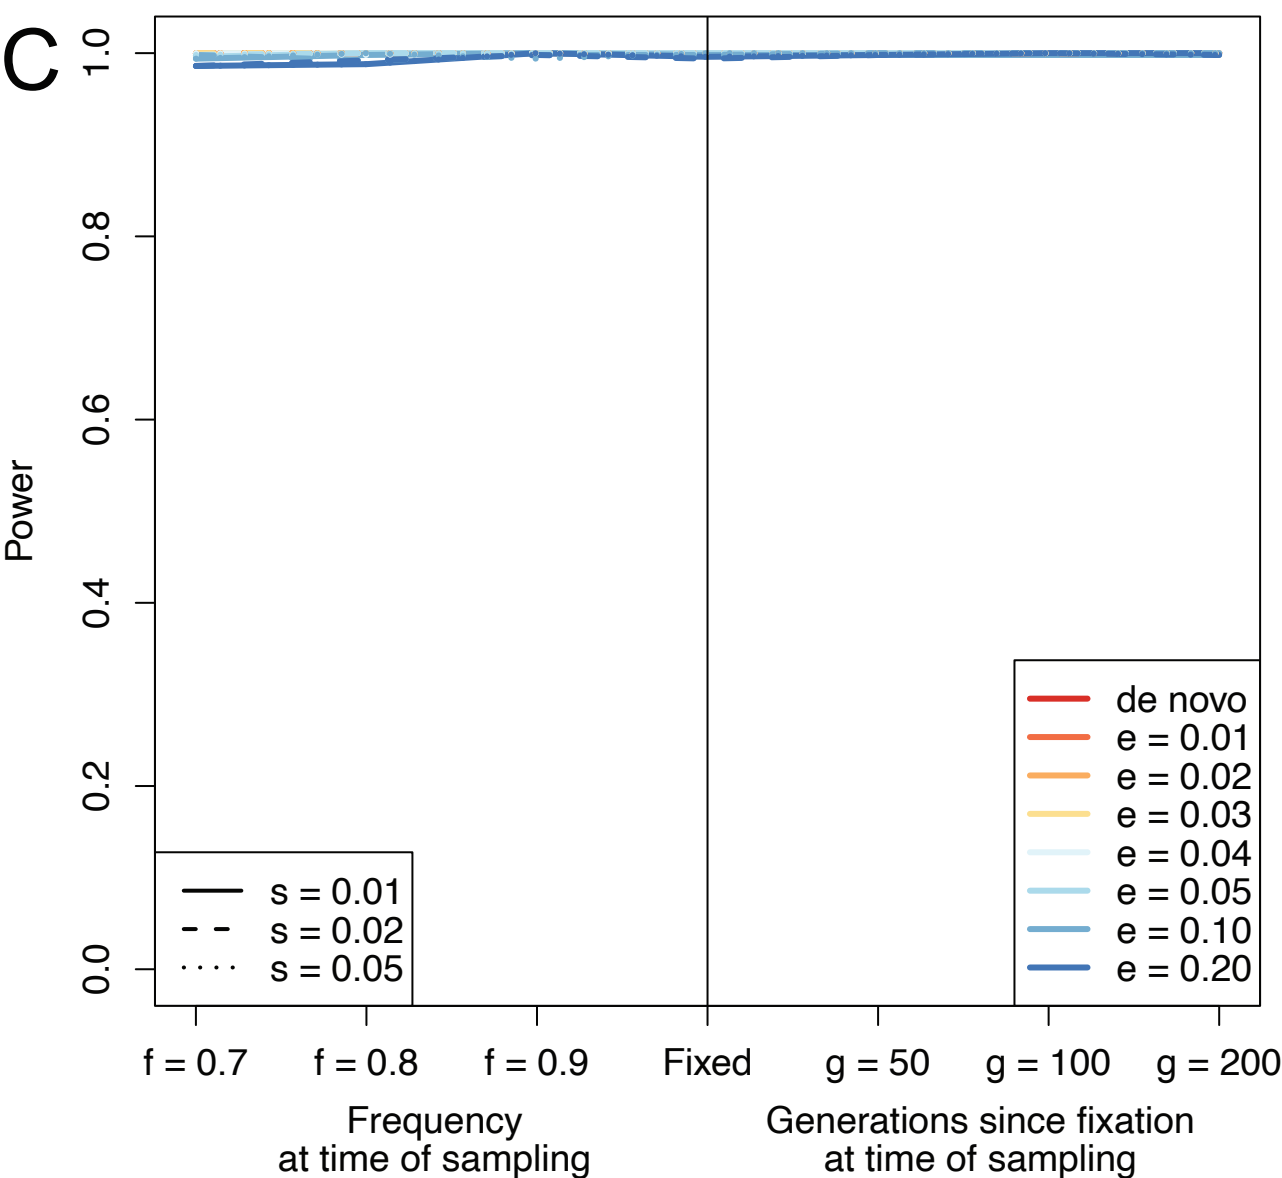

Supplement: EVL3-5-408-s005.pdf [file EVL3-5-408-s005.pdf]
